# Supplementary material for: Three years of measurements of light-absorbing aerosols over coastal Namibia: seasonality, origin, and transport
Source: Copernicus journal article supplement (doi:10.5194/acp-18-17003-2018), 2018-11-30

Supplement of Atmos. Chem. Phys., 18, 17003–17016, 2018  
<https://doi.org/10.5194/acp-18-17003-2018-supplement>  
© Author(s) 2018. This work is distributed under  
the Creative Commons Attribution 3.0 License.

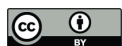

*Supplement of*

## **Three years of measurements of light-absorbing aerosols over coastal Namibia: seasonality, origin, and transport**

**Paola Formenti et al.**

*Correspondence to:* Paola Formenti ([paola.formenti@lisa.u-pec.fr](mailto:paola.formenti@lisa.u-pec.fr))

The copyright of individual parts of the supplement might differ from the CC BY 3.0 License.

**Figure S1.** Time series of the fine (black line) and coarse mode (grey line) aerosol optical depths obtained at HBAO between February and June 2011 (upper panel) and July to December 2015 (lower panel).

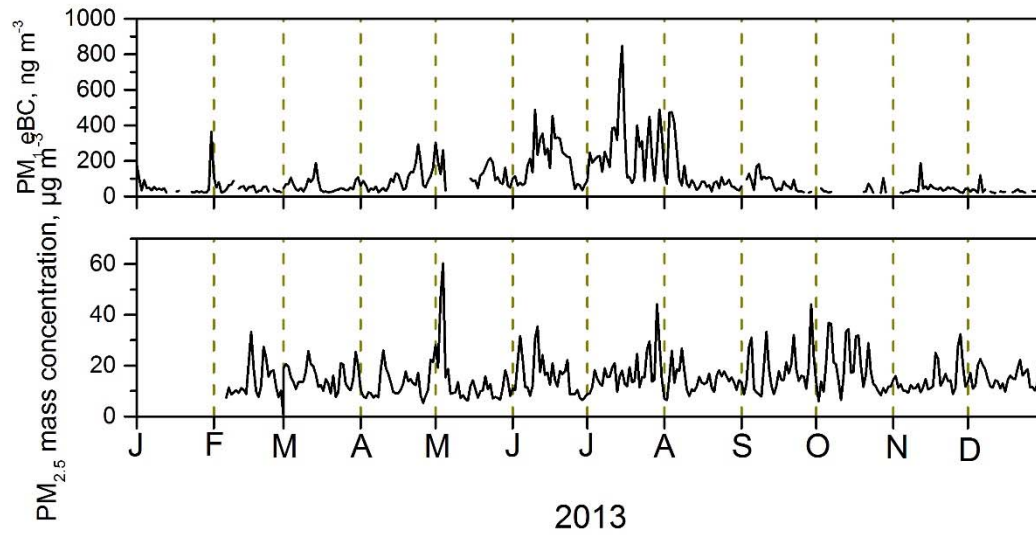

**Figure S2.** Time series of the fine (black line) and coarse mode (grey line) aerosol optical depths obtained at HBAO between February and July 2011 (upper panel) and July to December 2015 (lower panel).

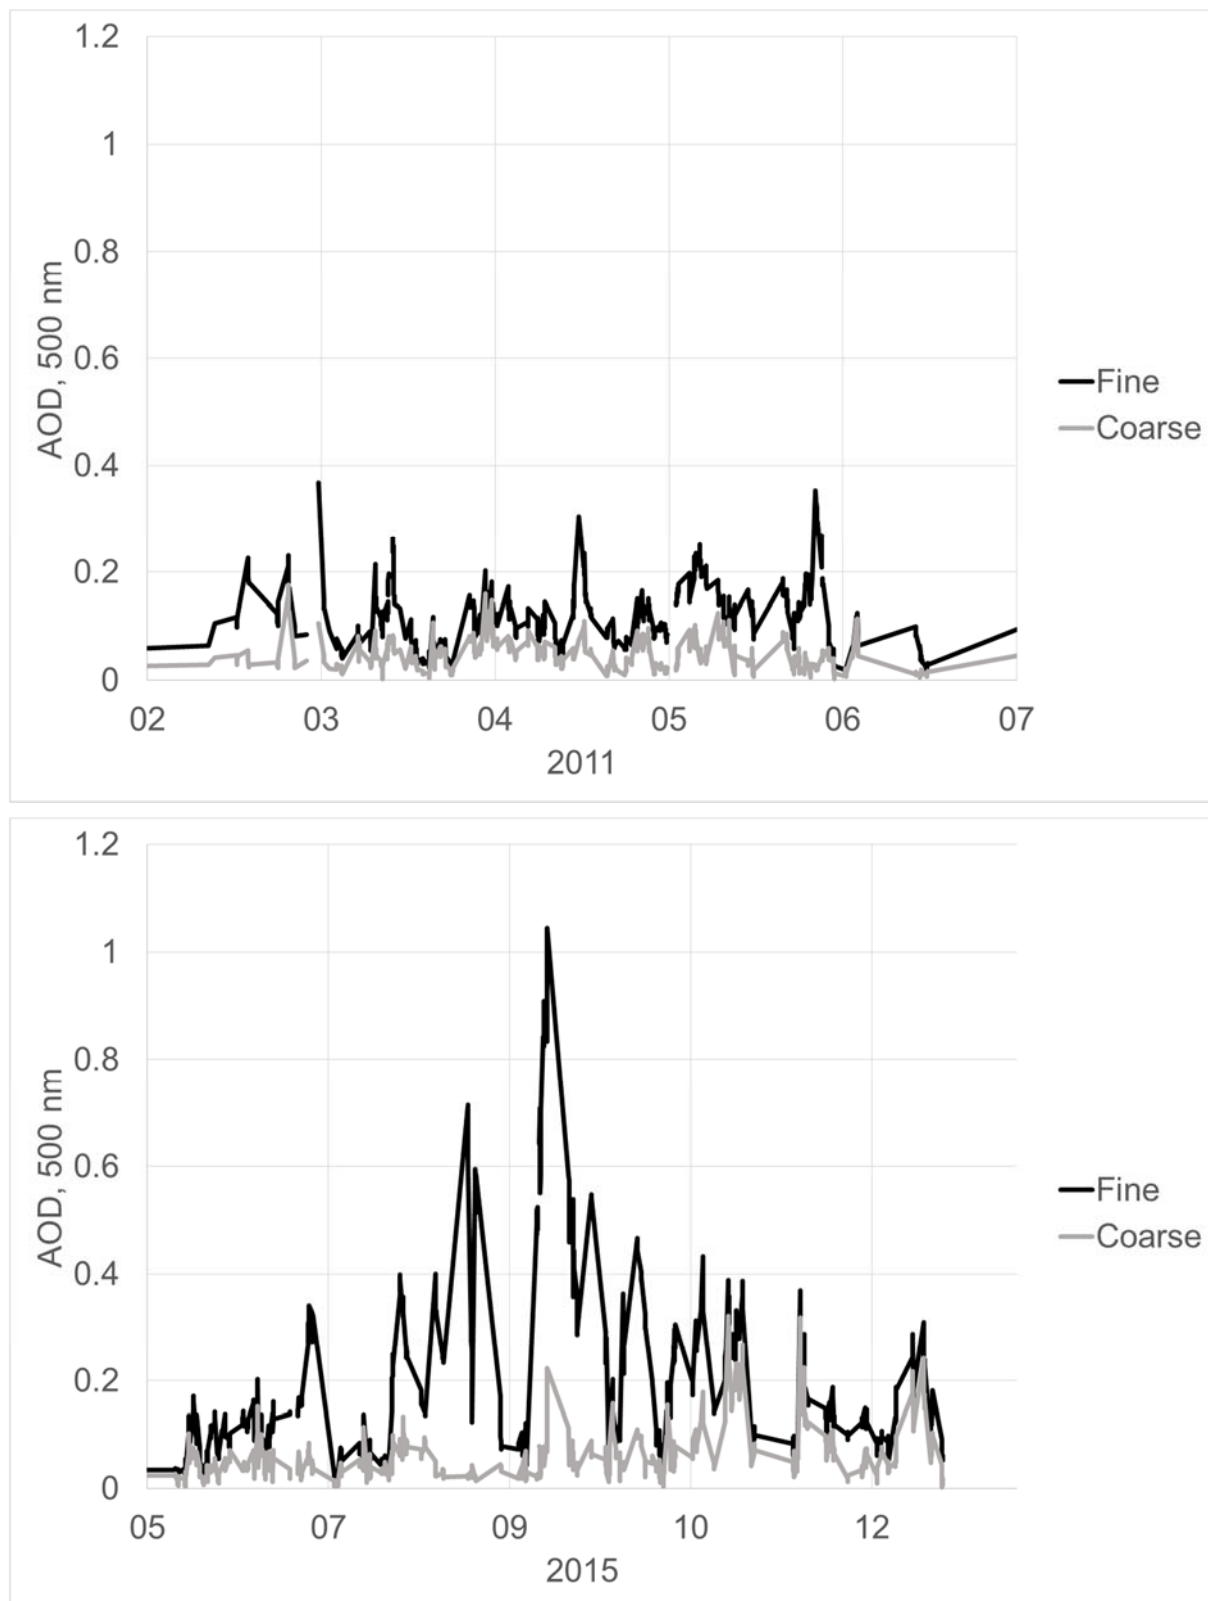

Supplement: Supplementary file 1 [file acp-18-17003-2018-supplement.pdf]
